# Supplementary material for: Ampere-level oxygen evolution reaction driven by Co3O4 nanoparticles supported on layered TiO2
Source: Royal Society of Chemistry journal article supplement (doi:10.1039/d4cy00557k), 2024-01-01
Supplement: d4cy00557k1.pdf [file d4cy00557k1.pdf]

Supporting Information (SI):

**Ampere-level oxygen evolution reaction driven by  $\text{Co}_3\text{O}_4$  nanoparticles supported on the layered  $\text{TiO}_2$**

Hong Tang<sup>a</sup>, Wei Wu<sup>a</sup>, Takahiro Kojima<sup>a</sup>, Kenji Kazumi<sup>b</sup>, Kazuhiro Fukami<sup>b</sup> and Hiroshi Sakaguchi<sup>\*a</sup>

<sup>a</sup> Institute of Advanced Energy, Kyoto University, Kyoto 611-0011, Japan

<sup>b</sup> Department of Materials Science and Engineering, Kyoto University, Kyoto 606-8501, Japan

\* Corresponding author

E-mail: sakaguchi@iae.kyoto-u.ac.jp

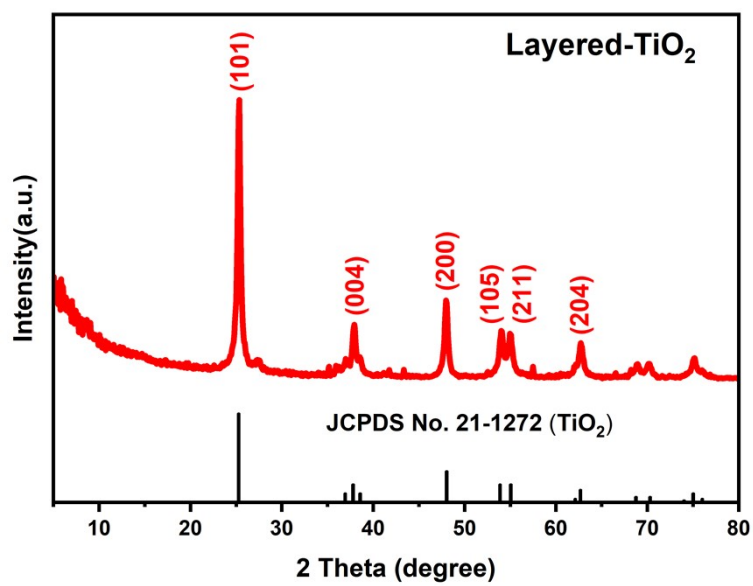

Fig. S1 XPD pattern of layered-TiO<sub>2</sub>.

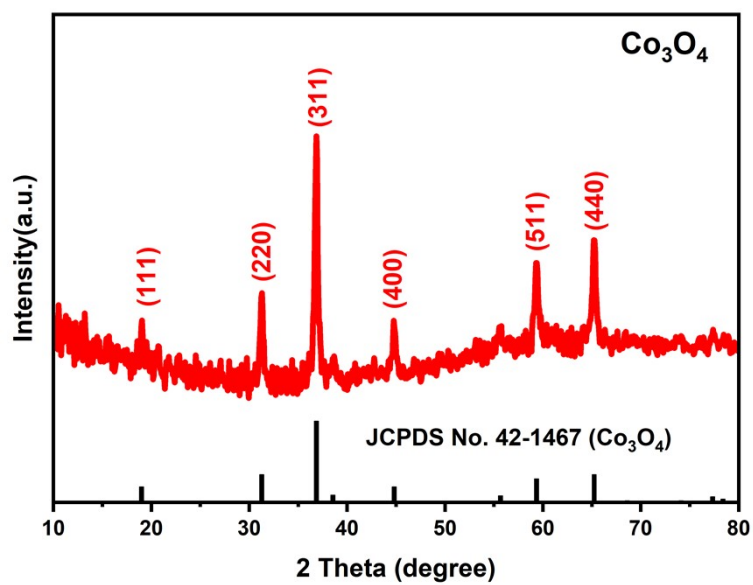

Fig. S2 XPD pattern of Co<sub>3</sub>O<sub>4</sub>.

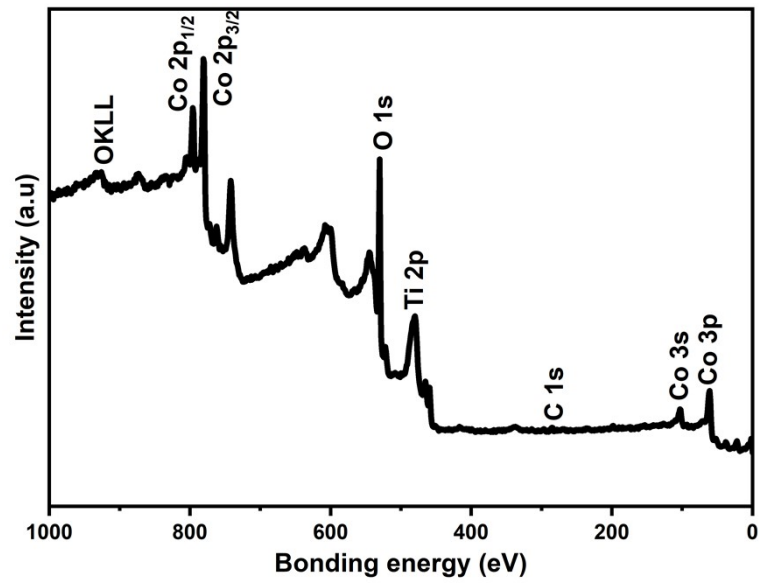

**Fig. S3** XPS survey spectrum of  $\text{Co}_3\text{O}_4$ @layered- $\text{TiO}_2$ .

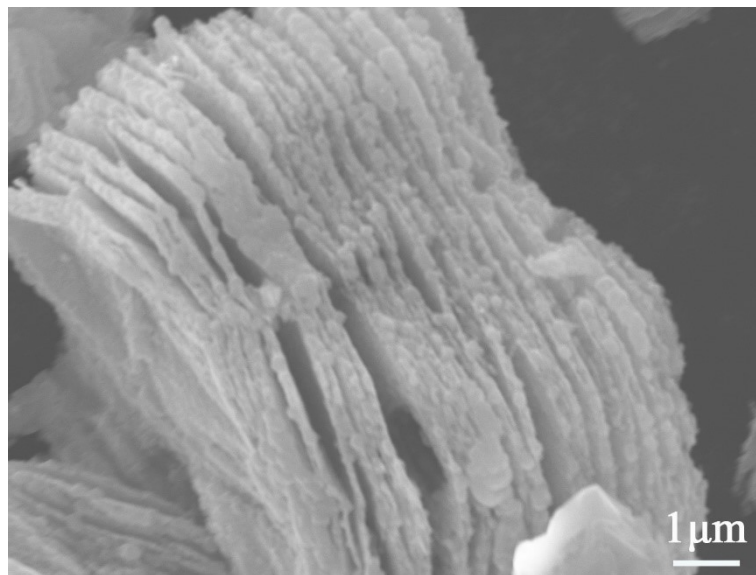

**Fig. S4** SEM image of layered- $\text{TiO}_2$ .

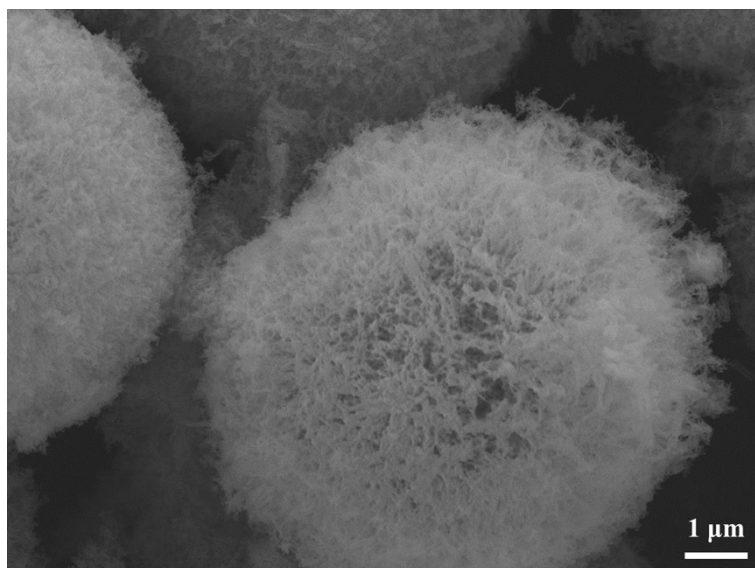

**Fig. S5** SEM image of  $\text{Co}_3\text{O}_4$ .

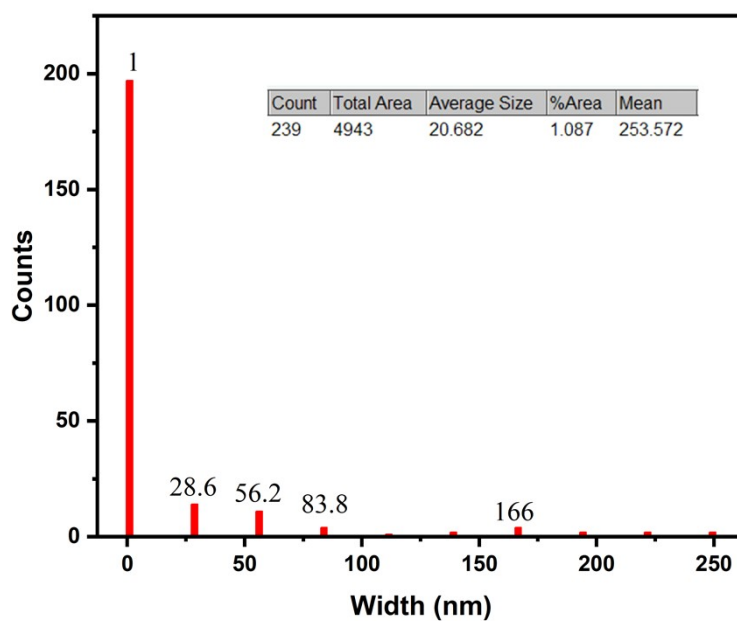

**Fig. S6** Statistical analysis of particle size distribution of  $\text{Co}_3\text{O}_4$  nanoparticles on  $\text{TiO}_2$  substrate.

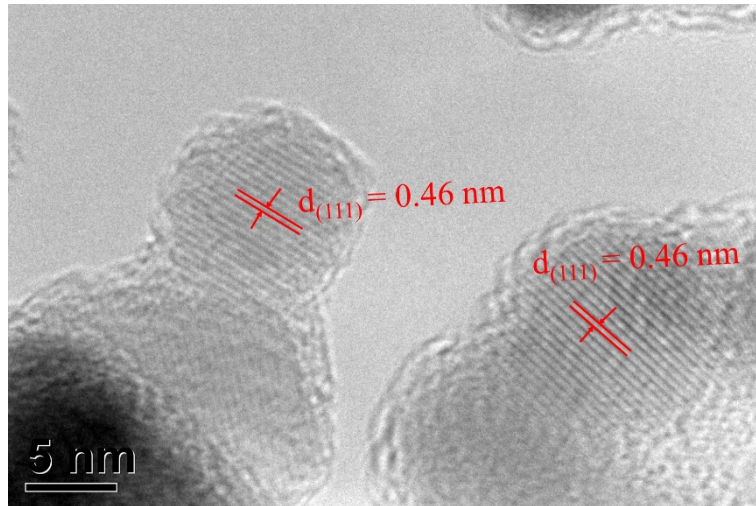

**Fig. S7** HR-TEM image of Co<sub>3</sub>O<sub>4</sub>@layered-TiO<sub>2</sub>.

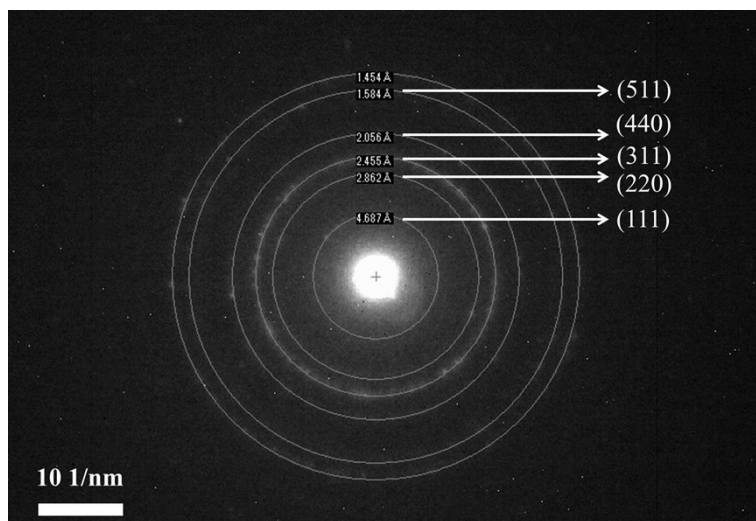

**Fig. S8** SEAD image of Co<sub>3</sub>O<sub>4</sub> in Co<sub>3</sub>O<sub>4</sub>@layered-TiO<sub>2</sub>.

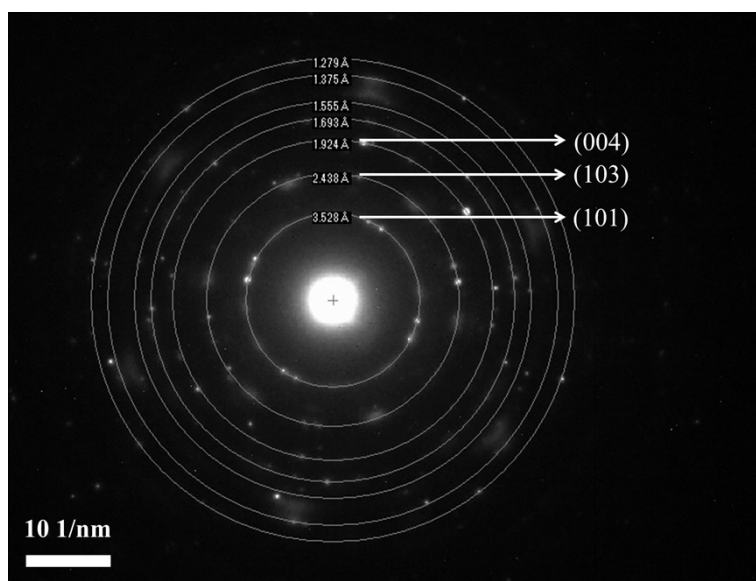

**Fig. S9** SEAD image of  $\text{TiO}_2$  in  $\text{Co}_3\text{O}_4$ @layered- $\text{TiO}_2$ .

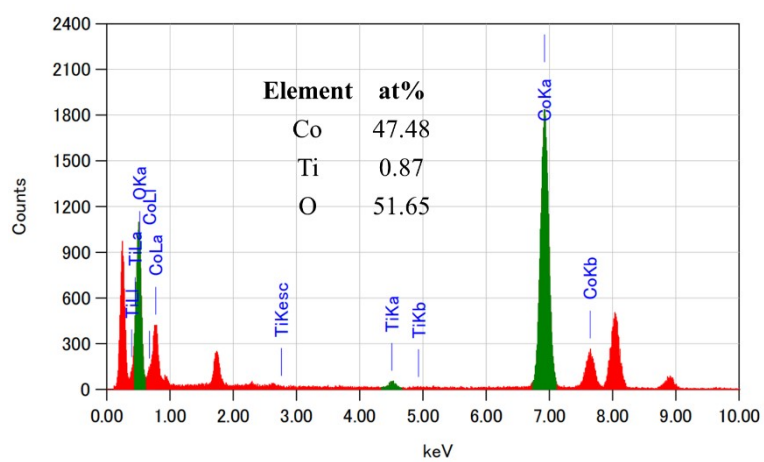

**Fig. S10** EDX image of  $\text{Co}_3\text{O}_4$ @layered- $\text{TiO}_2$ .

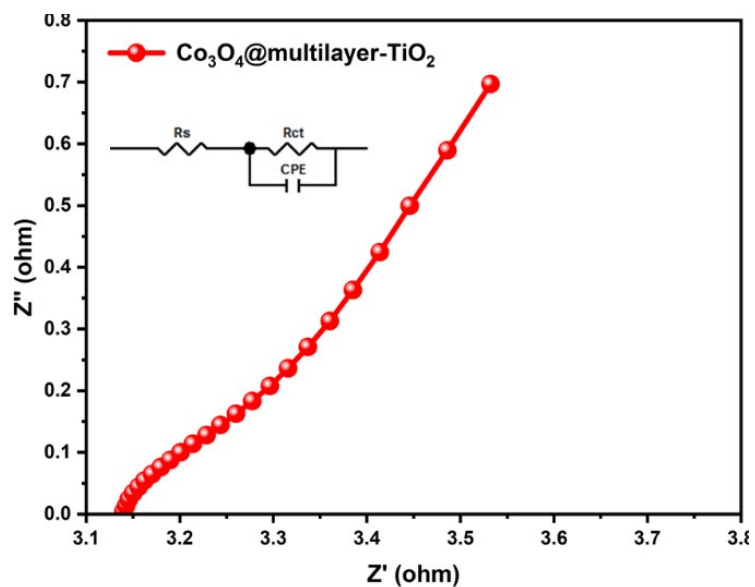

**Fig. S11** EIS spectrum of  $\text{Co}_3\text{O}_4$ @layered- $\text{TiO}_2$ . Insert shows equivalent circuit.

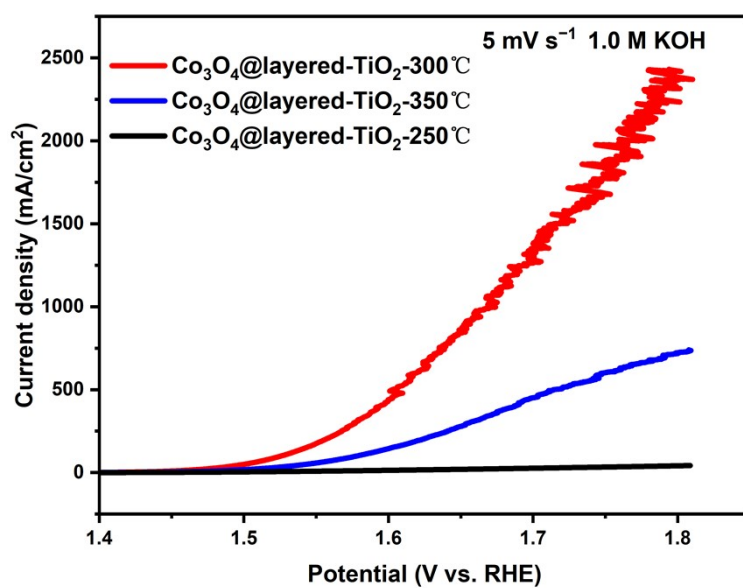

**Fig. S12** LSV curves of  $\text{Co}_3\text{O}_4$ @layered- $\text{TiO}_2$  under different annealing temperatures (250, 300 and 350 °C).

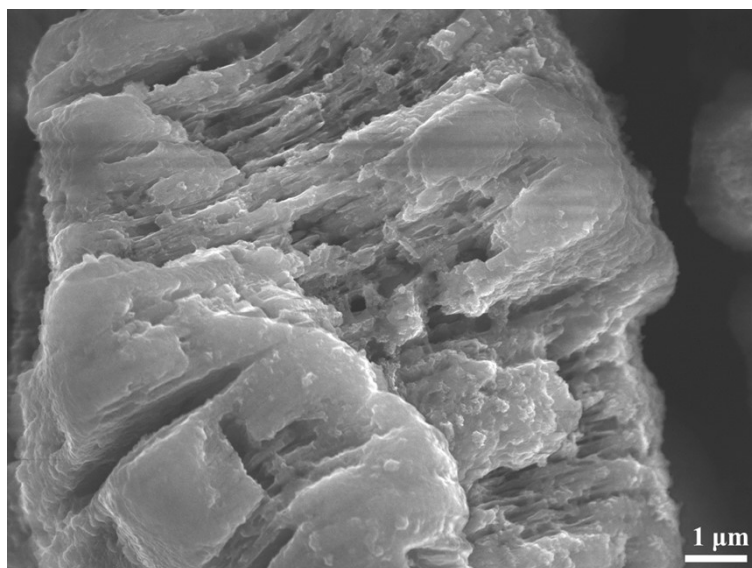

**Fig. S13** SEM image of Co<sub>3</sub>O<sub>4</sub>@layered-TiO<sub>2</sub> after galvanostatic measurement.

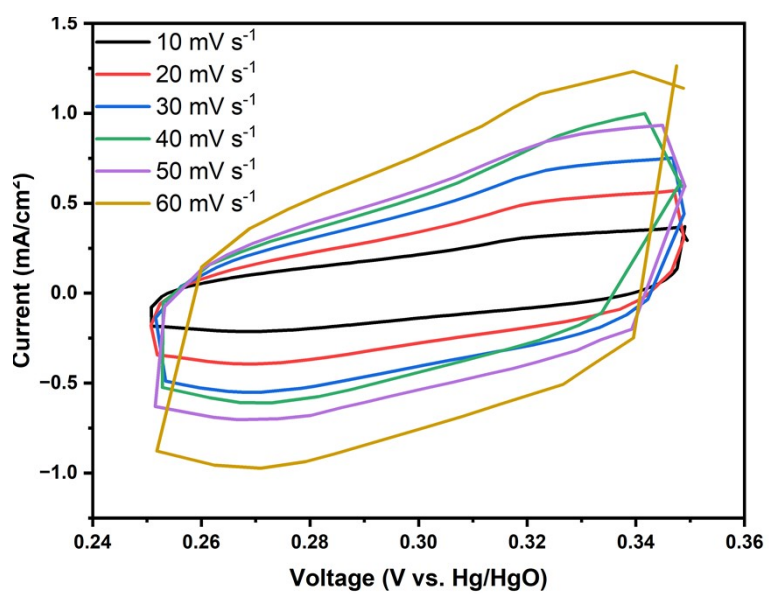

**Fig. S14** CV curves of Co<sub>3</sub>O<sub>4</sub>@layered-TiO<sub>2</sub> in 1.0 M KOH.



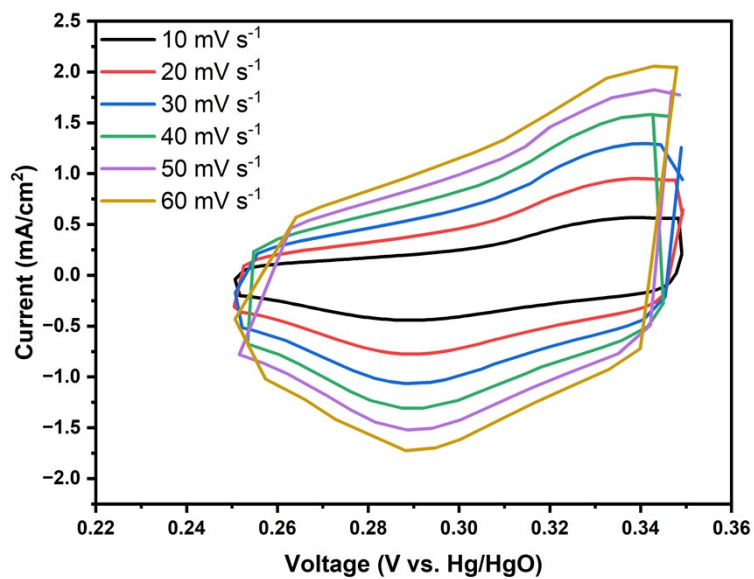

**Fig. S15** CV curves of RuO<sub>2</sub> in 1.0 M KOH.

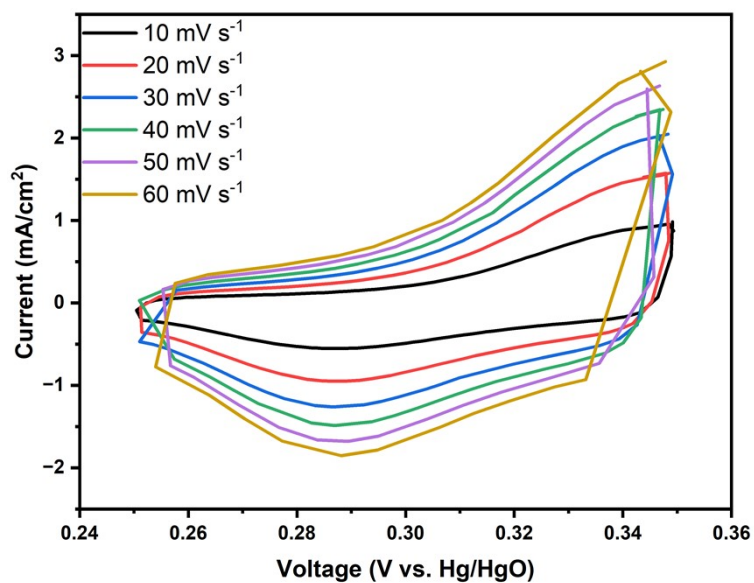

**Fig. S16** CV curves of Co<sub>3</sub>O<sub>4</sub> in 1.0 M KOH.

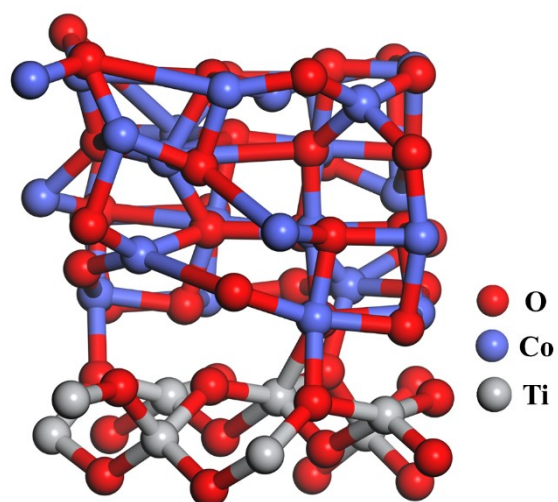

**Fig. S17** Optimized structural model of  $\text{TiO}_2\text{-Co}_3\text{O}_4$ .

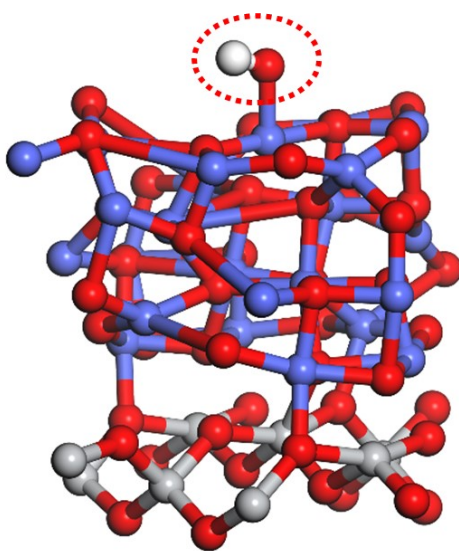

**Fig. S18** Optimized the structural model after adsorbing OH on the Co site of  $\text{TiO}_2\text{-Co}_3\text{O}_4$ .

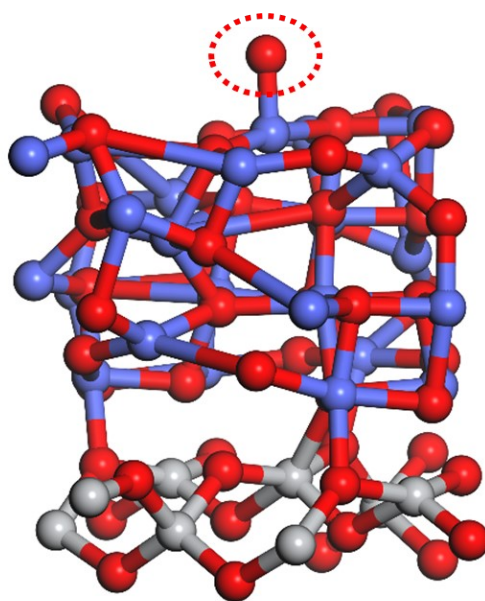

**Fig. S19** Optimized the structural model after adsorbing O on the Co site of TiO<sub>2</sub>-Co<sub>3</sub>O<sub>4</sub>.

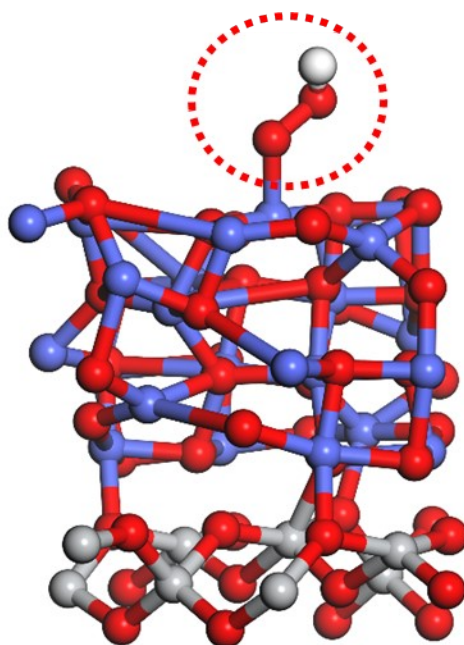

**Fig. S20** Optimized the structural model after adsorbing OOH on the Co site of TiO<sub>2</sub>-Co<sub>3</sub>O<sub>4</sub>.

**Table S1.** Previously reported literature of splendid Co<sub>3</sub>O<sub>4</sub>-based oxygen evolution catalysts.

| <b>Reference</b> |                                                         | <b>Catalyst</b>                                                              |
|------------------|---------------------------------------------------------|------------------------------------------------------------------------------|
| 1                | our work                                                | TiO <sub>2</sub> -Co <sub>3</sub> O <sub>4</sub>                             |
| 2                | <i>J. Alloys Compd.</i> 2021, 853, 156946               | Co <sub>3</sub> O <sub>4</sub> -MoS <sub>2</sub> thin films                  |
| 3                | <i>Adv. Energy Sustainability Res.</i> 2023, 4, 2300123 | Co <sub>3</sub> O <sub>4</sub> /CeO <sub>2</sub> heterojunction nanonetworks |
| 4                | <i>ACS Appl. Energy Mater.</i> 2020, 3, 5439–5447       | n-Co <sub>3</sub> O <sub>4</sub>                                             |
| 5                | <i>Carbon Energy</i> 2023, 5, 279                       | Mo-Co <sub>3</sub> O <sub>4</sub> @CC                                        |
| 6                | <i>ACS Catal.</i> 2022, 12, 13482–13491                 | Ir <sub>0.33</sub> @Co <sub>3</sub> O <sub>4</sub>                           |
| 7                | <i>Angew. Chem. Int. Ed.</i> 2020, 59, 6929 – 6935      | CoO/Co <sub>3</sub> O <sub>4</sub>                                           |
| 8                | <i>Adv. Mater.</i> 2018, 30, 1801211                    | Co <sub>3</sub> O <sub>4</sub> /Co-Fe oxide                                  |
| 9                | <i>Adv. Energy Mater.</i> 2021, 11, 2101324             | NiMoO <sub>4</sub> @Co <sub>3</sub> O <sub>4</sub>                           |
| 10               | <i>ACS Catal.</i> 2018, 8, 2236–2241                    | P <sub>8.6</sub> -Co <sub>3</sub> O <sub>4</sub> /NF                         |
| 11               | <i>ACS Catal.</i> 2023, 13, 2462–2471                   | Ru/Co <sub>3</sub> O <sub>4-x</sub>                                          |
| 12               | <i>Adv. Mater.</i> 2020, 32, 2002235                    | Fe-Co <sub>3</sub> O <sub>4</sub>                                            |
| 13               | <i>Adv. Energy Mater.</i> 2018, 8, 1701694              | O-Co <sub>3</sub> O <sub>4</sub>                                             |
| 14               | <i>Adv. Energy Mater.</i> 2023, 13, 2302537             | Ir/Ni-Co <sub>3</sub> O <sub>4</sub>                                         |
